# Supplementary material for: Sputtering graphite coating to improve the elevated-temperature cycling ability of the LiMn2O4 electrode
Source: Royal Society of Chemistry journal article supplement (doi:10.1039/c4cp01069h), 2014-01-01
Supplement: c4cp01069h1.pdf [file c4cp01069h1.pdf]

## Electronic Supplementary Information

### Sputtering graphite coating to improve the elevated-temperature cycling ability of $\text{LiMn}_2\text{O}_4$ electrode

Jiexi Wang,<sup>a,#</sup> Qiaobao Zhang,<sup>b,#</sup> Xinhai Li,<sup>a,&</sup> Zhixing Wang,<sup>a</sup> Huajun Guo,<sup>a</sup> Daguo Xu,<sup>b</sup> Kaili Zhang<sup>b,&</sup>

<sup>a</sup> School of Metallurgy and Environment, Central South University, 932, South Lushan Road, Changsha, P.R. China, 410083

<sup>b</sup> Department of Mechanical and Biomedical Engineering, City University of Hong Kong, 83 Tat Chee Avenue, Kowloon, Hong Kong.

& Corresponding authors. [Xinhaili\\_csu@126.com](mailto:Xinhaili_csu@126.com) (Xinhai Li);

[kaizhang@cityu.edu.hk](mailto:kaizhang@cityu.edu.hk) (Kaili Zhang)

# Jiexi Wang and Qiaobao Zhang contributed equally to this work.

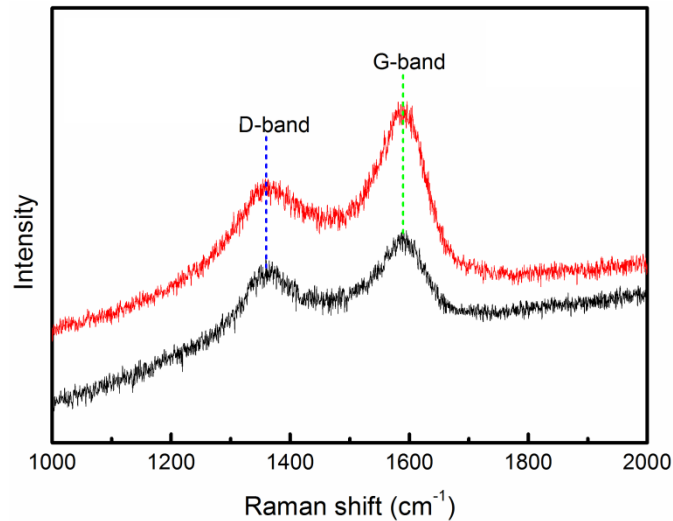

**Fig. S1** Raman spectra of samples before (black line) and after (red line) 30 min sputtering of graphite

In **Fig. S1**, two peaks are observed at  $\sim 1360$  and  $\sim 1588$   $\text{cm}^{-1}$ , which correspond to the  $A_{1g}$  mode of disordered carbon (D-band) and the Raman active  $E_{2g}$  mode of the graphitic carbon lattice vibration (G-band), respectively. The G-LMO sample shows a lower  $I_D/I_G$  ratio than LMO, indicating that G-LMO owns higher degree of graphitization. With this evidence, we can conclude that the graphitic carbon has been coated on the surface of the  $\text{LiMn}_2\text{O}_4$  electrode by magnetron sputtering.

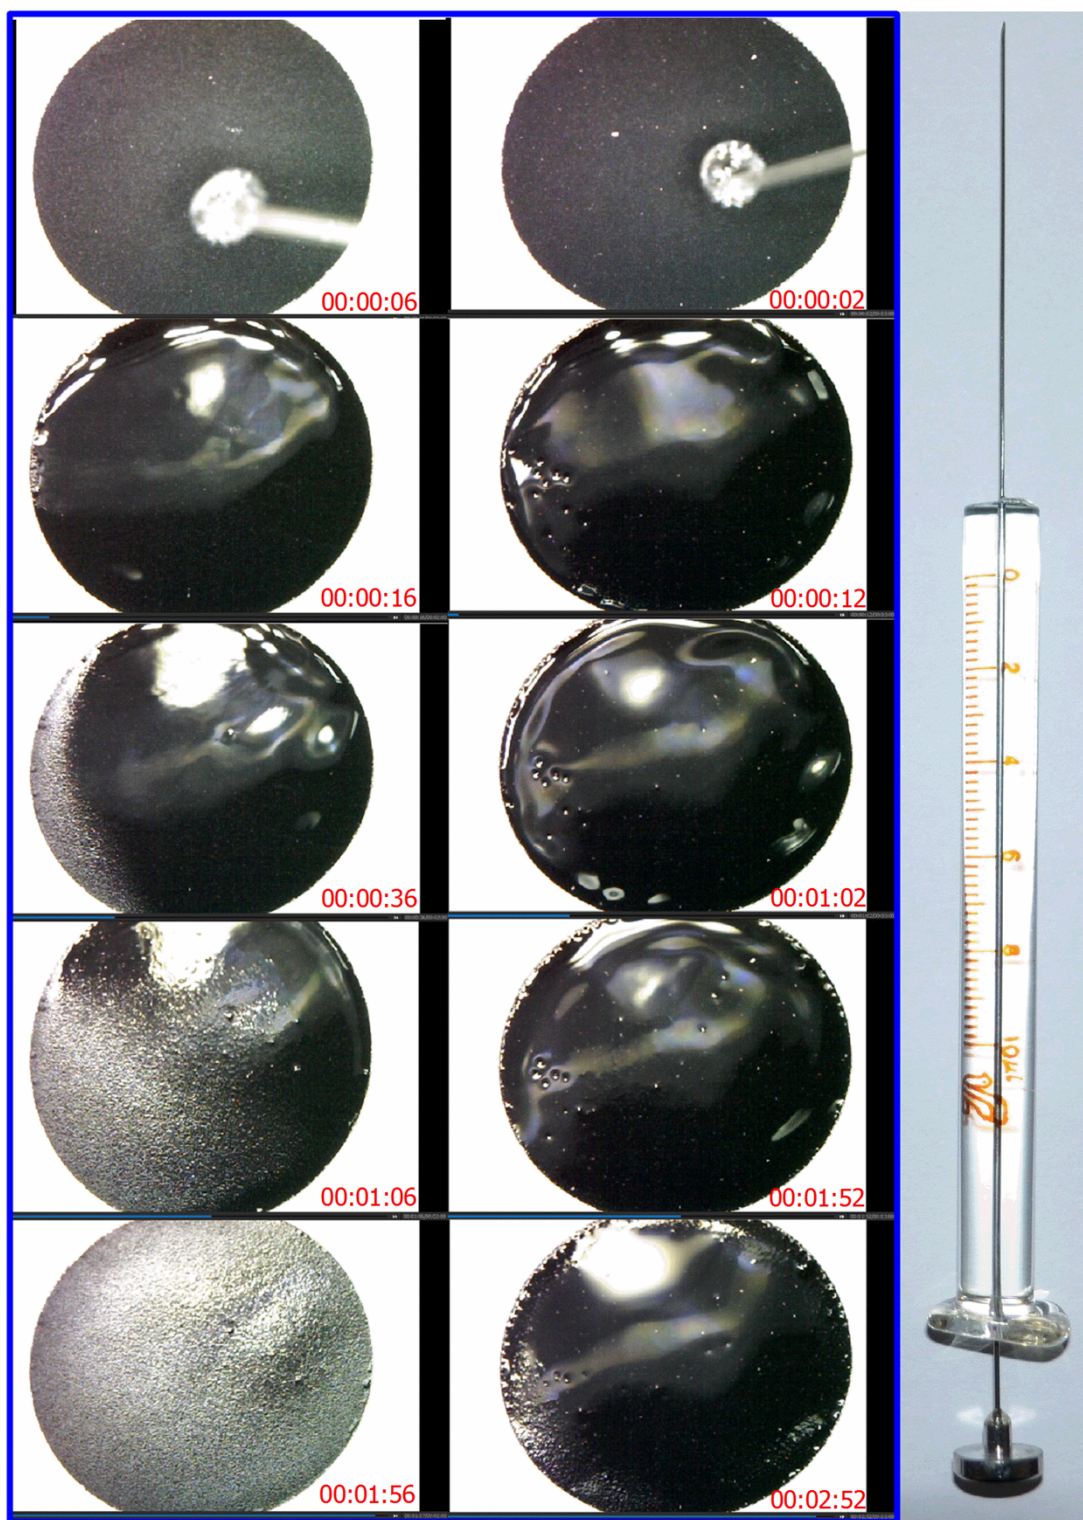

BLMO

GLMO-30

Fig. S2 Pictures of videos recording the electrolyte dispersion into the BLMO and GLMO-

To identify the difference of wettability of LMO cathodes before and after graphite coating, we videoed by adding the same amount (10  $\mu\text{L}$ ) of electrolyte to the prepared electrodes (BLMO and GLMO-30) and observing the dispersion into the electrodes as a function of time. To clearly and intuitively observe the electrolyte dispersion, Pictures at different time were taken and shown in Fig. S1. It is clearly seen that the electrolyte can completely dispersed into BLMO while there still exists large amount of liquid electrolyte on the surface of GLMO-30. Given this phenomenon, we are able to conclude that the BLMO has better wettability than GLMO-30.
